# Supplementary material for: Establishment of multiplex RT-PCR to detect fusion genes for the diagnosis of Ewing sarcoma
Source: Springer Nature journal article supplement (doi:10.1186/s13000-021-01164-6), 2021-11-08
Supplement: MOESM1 [file 19845390]

**Supplementary Table S1.** List of antibodies

| <b>Antibody</b> | <b>Clone</b> | <b>Dilution</b> | <b>Resource</b>          |
|-----------------|--------------|-----------------|--------------------------|
| CD99            | O13          | 1:800           | ThermoFischer Scientific |
| Nkx2.2          | 74.5A5       | 1:200           | BD Biosciences           |
| S100            | -            | 1:2000          | DakoCytomation (agilent) |
| desmin          | D33          | 1:100           | DakoCytomation (agilent) |
| myogenin        | F5D          | 1:100           | DakoCytomation (agilent) |
| Myo-D1          | 5.8A         | 1:50            | DakoCytomation (agilent) |
| cytokeratin     | AE1/AE3      | 1:1             | NICHIREI BIOSCIENCES     |
| CD31            | JC70A        | 1:100           | DakoCytomation (agilent) |
| CD34            | QBEnd10      | 1:100           | DakoCytomation (agilent) |
| CD3             | PS1          | 1:1             | NICHIREI BIOSCIENCES     |
| CD20            | L26          | 1:200           | DakoCytomation (agilent) |
| CD1a            | O10          | 1:2             | MBL                      |
