# Supplementary material for: Establishment of multiplex RT-PCR to detect fusion genes for the diagnosis of Ewing sarcoma
Source: Springer Nature journal article supplement (doi:10.1186/s13000-021-01164-6), 2021-11-08
Supplement: MOESM2 [file 19845390]

**Supplementary Table S2.** Sequences of genomic PCR and sequencing primers

| <b>Primer name</b> | <b>Sequence (5' --- 3')</b> |
|--------------------|-----------------------------|
| EWSR1 fw28         | cctcaatctagcacaggggg        |
| ERG ex9/int9 rv    | agccaacactgtaccttcgac       |
