# Supplementary material for: Establishment of multiplex RT-PCR to detect fusion genes for the diagnosis of Ewing sarcoma
Source: Springer Nature journal article supplement (doi:10.1186/s13000-021-01164-6), 2021-11-08
Supplement: MOESM3 [file 19845390]

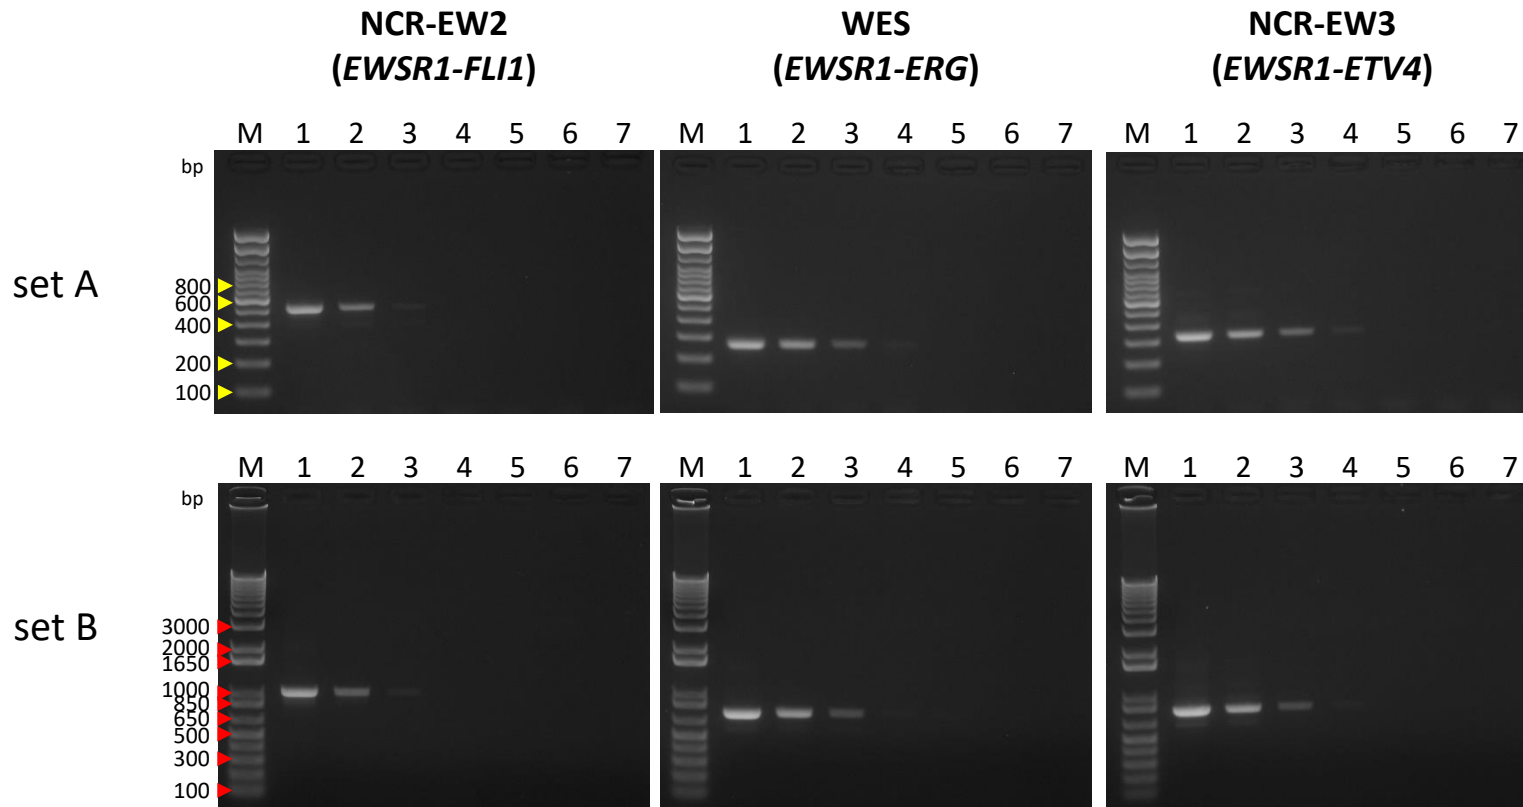

**Supplementary Figure S1. Detection sensitivity of primers for *EWSR1-ETS* cDNA**

Serial dilutions of cDNA from Ewing sarcoma cell lines were amplified by Set A (upper panel) or Set B primers (lower panel). Lane M: Trackit 100-bp ladder marker (upper panel, yellow arrowhead) or Trackit 1-kbp plus ladder (lower panel, red arrowhead), molecular marker sizes are indicated in the left.; lane 1: template cDNA corresponding to 10 ng to total RNA; lane 2: 1 ng; lane 3: 100 pg; lane 4: 10 pg; lane 5: 1 pg; lane 6: 0.1 pg; lane 7: no template control.
