# Supplementary material for: Establishment of multiplex RT-PCR to detect fusion genes for the diagnosis of Ewing sarcoma
Source: Springer Nature journal article supplement (doi:10.1186/s13000-021-01164-6), 2021-11-08
Supplement: MOESM4 [file 19845390]

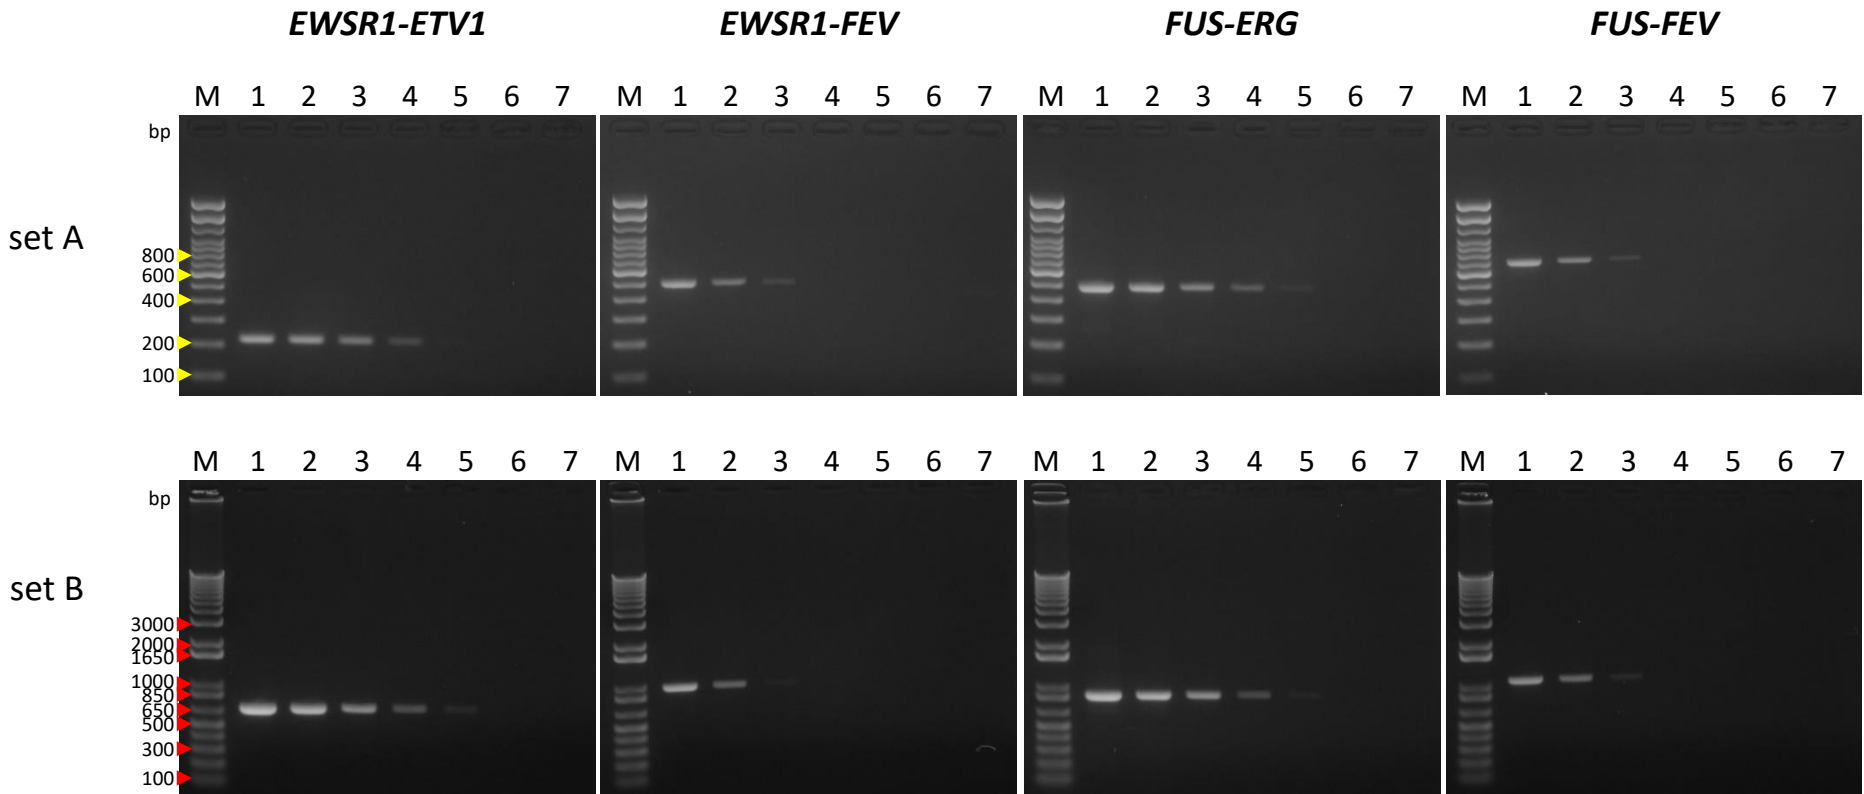

**Supplementary Figure S2. Detection sensitivity of primers for *EWSR1-ETS* plasmids**

Serial dilutions of *EWSR1/FUS-ETS*-containing plasmids were amplified using primer Set A (upper panels) and Set B (lower panels). We estimated the molecular weight from the size of each plasmid, and made serial dilution of the respective plasmids and used  $10^5$  to  $10^0$  molecules as a starting template in 25  $\mu$ l of the PCR reaction mix. Lane M: Trackit 100-bp ladder marker (upper panel, yellow arrowhead) or Trackit 1-kbp plus ladder (lower panel, red arrowhead), molecular marker sizes are indicated in the left. ; lane 1:  $10^5$  molecules; lane 2:  $10^4$  molecules; lane 3:  $10^3$  molecules; lane 4:  $10^2$  molecules; lane 5:  $10^1$  molecules; lane 6:  $10^0$  molecule; lane 7: no template control.
