# Supplementary material for: Establishment of multiplex RT-PCR to detect fusion genes for the diagnosis of Ewing sarcoma
Source: Springer Nature journal article supplement (doi:10.1186/s13000-021-01164-6), 2021-11-08
Supplement: MOESM5 [file 19845390]

# Supplementary Figure S3

a

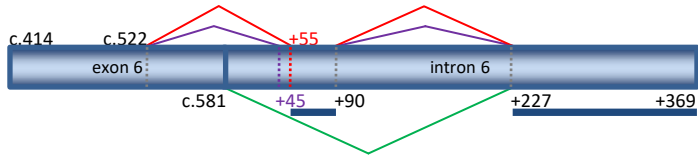

b

*EWSR1* exon 6 (chr22: 29,282,390 - 29,282,557, strand= +, c.414-c.581)

**ACCGCAGGATGGAAACAAGCCCACTGAGACTAGTCAACCTCAATCTAGCA  
 CAGGGGGTTACAACCAGCCAGCCTAGGATATGGACAGAGTAACTACAGT  
 TATCCCCAGGT**ACCTGGGAGCTACCCCATGCAGCCAGTCACTGCACCTCC  
 ATCCTACCCTCCTACCAG

*EWSR1* intron 6 (chr22: 29,282,558 - 29,282,950, stand=+)

+1 +45  
gtcagtctactttttgtggcaaaacaaaacagtgacaaaacagtttttt  
 +55 +90  
tcaggttggtgaccagcttgctttgacttcttcagctaaggtatgtttatc  
tgactgtcgcagtgataagtcactgaccatacttggttacattaagcc  
tgagatctagggtcccatagtggtgacctggcagctaataactattctttt  
 +227  
ttctttttttttttttttttcccccagacggagtcctctctctgtcgccag  
gctggagtgacagtggtggtgatctcggtcactgcaagctccacctctgg  
gttcacgccattctctgctcaacctcccagtagctgggactacgggt  
 +369  
gcccgccaccacgccagctaattttttgtattttagtagag-----

c

*ERG* intron 8 (chr21: 38392674 - 38392445 strand= - )

```
-----agaatctgccaatggaagttttcagacaaacggtgagaa
                                -214                                -198
ttttagaccactataataatatgaaattttaatttgtaaataaaactcaaa
tctagtgggatatttctttggattaccagatttttttgcacaaagtttat
tctaataaatacaaaaatcaaataaaaaaccaaagcatctcttataaaaat

tacatgattgatcttttagtcaatttatttgtctttacag-1
```

*ERG* exon 9 (chr21: 38,392,376 - 38,392,444 strand= - , c.767-c.835)

```
ATTTACCATATGAGCCCCCAGGAGATCAGCCTGGACCGGTCACGGCCAC
CCCACGCCCCAGTCGAAAAG
```

### Supplementary Figure S3. Scheme of alternative splicing and sequence in novel *EWSR1-ERG* transcripts

(a) Scheme of exon 6 and first 369 bases of intron 6 of *EWSR1*. The splicing patterns of the in-frame variant are represented by red lines and a red number. The splicing sites shared by some variants are denoted by black numbers. The two blue bars under intron 6 are cryptic exonic regions of the in-frame variant. The splicing patterns of the two out-of-frame variants are shown in purple and green, respectively. No sequence was spliced out in one variant. (b) Sequences of *EWSR1* exon 6 and intron 6 (c.581+1 to +393) and alternative splicing sites. The genomic location numbers are based on the GRCh37/hg19 version. The boldfaced sequences represent truncated exon 6 (c.414 to c.522). The sequences corresponding to the cryptic exon in intron 6 are underlined. GT/gt (green character): splice donor sites, ag (red character): splice acceptor sites. Sites involved in splicing are numbered in the upper part of the sequences. (c) Sequences of *ERG* intron 8 (c.767-1 to -230) and exon 9 and alternative splicing sites. The genomic location numbers and sites involved in splicing are shown as in (b).
